# Supplementary material for: Elucidating structural basis of benzofuran pyrrolidine pyrazole derivatives for enhancing potency against both the InhA enzyme and intact M. tuberculosis cells: a combined MD simulations and 3D-QSAR study
Source: Royal Society of Chemistry journal article supplement (doi:10.1039/c5ra08103c), 2015-01-01
Supplement: c5ra08103c1.pdf [file c5ra08103c1.pdf]

**Table S1.** The CoMFA and CoMSIA molecular descriptors used in this study.

| Cpd. | IC <sub>50</sub> (nM) | MIC <sub>90</sub> (μM) | CoMFA  |               |        |               | CoMSIA      |                |                   |
|------|-----------------------|------------------------|--------|---------------|--------|---------------|-------------|----------------|-------------------|
|      |                       |                        | Steric | Electrostatic | Steric | Electrostatic | Hydrophobic | Hydrogen donor | Hydrogen acceptor |
| 1    | 0.034                 | 8.00                   | 89.00  | 178.00        | 7.21   | 1.18          | 5.32        | 1.36           | 3.74              |
| 2*   | 0.005                 | 0.50                   | 95.00  | 190.00        | 7.38   | 1.27          | 5.69        | 1.45           | 4.44              |
| 3    | 0.012                 | 3.00                   | 83.00  | 166.00        | 6.85   | 1.17          | 5.43        | 1.71           | 3.91              |
| 4    | 0.046                 | 4.00                   | 95.00  | 190.00        | 7.23   | 1.25          | 5.53        | 1.40           | 3.94              |
| 5    | 0.021                 | 15.60                  | 92.00  | 184.00        | 7.43   | 1.19          | 5.49        | 1.37           | 3.92              |
| 6    | 0.014                 | 4.00                   | 99.00  | 198.00        | 7.43   | 1.25          | 5.63        | 1.37           | 4.68              |
| 7*   | 0.022                 | 4.00                   | 101.00 | 202.00        | 7.77   | 1.32          | 5.49        | 1.38           | 4.42              |
| 8    | 0.045                 | 4.00                   | 99.00  | 198.00        | 7.75   | 1.24          | 5.80        | 1.37           | 4.50              |
| 9    | 0.040                 | 4.00                   | 100.00 | 200.00        | 7.73   | 1.18          | 5.61        | 1.38           | 3.73              |
| 10   | 0.042                 | 16.00                  | 107.00 | 214.00        | 7.86   | 1.29          | 6.67        | 1.41           | 3.88              |
| 11*  | 0.009                 | 2.00                   | 106.00 | 212.00        | 7.67   | 1.23          | 6.11        | 1.39           | 3.91              |
| 12   | 0.035                 | 3.00                   | 106.00 | 213.00        | 7.90   | 3.37          | 5.95        | 1.40           | 3.90              |
| 13   | 0.112                 | 1.00                   | 114.00 | 228.00        | 8.16   | 1.26          | 6.40        | 1.54           | 4.47              |
| 14   | 0.025                 | 1.00                   | 109.00 | 218.00        | 7.79   | 1.25          | 5.76        | 1.38           | 3.87              |
| 15   | 0.018                 | 16.00                  | 99.00  | 198.00        | 7.39   | 1.29          | 5.31        | 1.39           | 4.03              |
| 16   | 0.009                 | 8.00                   | 97.00  | 194.00        | 7.38   | 1.29          | 5.35        | 1.40           | 4.47              |
| 17   | 0.003                 | 4.00                   | 97.00  | 194.00        | 7.57   | 1.27          | 5.29        | 1.40           | 4.35              |
| 18   | 0.032                 | 4.00                   | 107.00 | 214.00        | 7.81   | 1.33          | 5.55        | 1.38           | 4.07              |
| 19   | 0.005                 | 1.00                   | 97.00  | 194.00        | 7.41   | 1.23          | 5.57        | 1.39           | 4.14              |
| 20   | 0.021                 | 1.50                   | 100.00 | 200.00        | 7.62   | 1.21          | 5.65        | 1.36           | 3.74              |
| 21   | 0.015                 | 1.00                   | 96.00  | 192.00        | 7.45   | 1.27          | 5.62        | 1.38           | 4.51              |
| 22   | 0.003                 | 0.05                   | 104.00 | 208.00        | 7.59   | 1.33          | 5.82        | 1.37           | 5.10              |
| 23   | 0.004                 | 0.50                   | 86.00  | 172.00        | 7.06   | 1.17          | 5.50        | 1.68           | 3.90              |
| 24   | 0.002                 | 0.20                   | 119.00 | 238.00        | 8.04   | 2.91          | 5.71        | 1.40           | 3.86              |
| 25   | 0.004                 | 0.50                   | 98.00  | 196.00        | 7.70   | 1.27          | 6.92        | 1.37           | 4.39              |
| 26   | 0.004                 | 0.50                   | 110.00 | 220.00        | 8.02   | 1.24          | 5.84        | 1.38           | 4.00              |
| 27   | 0.003                 | 1.00                   | 95.00  | 190.00        | 7.49   | 1.19          | 5.73        | 1.47           | 4.20              |
| 28   | 0.002                 | 0.70                   | 105.00 | 210.00        | 7.80   | 1.21          | 5.62        | 1.38           | 4.13              |
| 29   | 0.005                 | 0.70                   | 101.00 | 202.00        | 7.77   | 1.26          | 5.77        | 1.40           | 4.52              |
| 30   | 0.029                 | 1.00                   | 99.00  | 198.00        | 7.41   | 1.33          | 5.92        | 1.39           | 4.53              |
| 31*  | 0.003                 | 1.50                   | 113.00 | 226.00        | 8.02   | 1.22          | 6.22        | 1.42           | 4.44              |
| 32   | 0.018                 | 2.00                   | 109.00 | 218.00        | 7.75   | 1.23          | 5.65        | 1.39           | 4.54              |
| 33   | 0.007                 | 2.00                   | 110.00 | 220.00        | 8.00   | 1.35          | 5.90        | 1.36           | 4.36              |
| 34   | 0.008                 | 2.00                   | 99.00  | 198.00        | 7.70   | 1.29          | 5.92        | 1.38           | 4.49              |

\*test set
